# Supplementary material for: The Use of Postoperative Compression Garments in Plastic Surgery—Necessary or Not? A Practical Review
Source: PubMed Central journal article supplement — Plast Reconstr Surg Glob Open. 2023 Sep 25;11(9):e5293. doi: 10.1097/GOX.0000000000005293 (PMC10519563; doi:10.1097/gox.0000000000005293), 2023-09-25
Supplement: gox-11-e5293-s001.pdf [file gox-11-e5293-s001.pdf]

### SDC 1. PubMed Search Strategy

|                   |                                                                                                                                                                                                                                                                                                                                                                                                                                                                                                                                                                                                                                                                                                                      |
|-------------------|----------------------------------------------------------------------------------------------------------------------------------------------------------------------------------------------------------------------------------------------------------------------------------------------------------------------------------------------------------------------------------------------------------------------------------------------------------------------------------------------------------------------------------------------------------------------------------------------------------------------------------------------------------------------------------------------------------------------|
| Facial surgery    | <p>((facial OR head OR neck) aesthetic surgery OR facial (aesthetics OR rejuvenation) OR facelift OR neck lift OR brow lift OR rhinoplasty OR blepharoplasty OR rhytidectomy OR genioplasty OR chin augmentation OR otoplasty OR mentoplasty OR buccal fat removal)</p> <p>AND</p> <p>(face mask OR compression OR compressive OR garment OR dressing OR tape OR wrapping OR bandage)</p> <p>AND</p> <p>(skin fold OR wrinkle OR jowl OR pain OR function OR seroma OR hematoma OR pressure OR comfort OR discomfort OR bruise OR ecchymosis OR edema OR aesthetics OR scar OR bruising OR induration OR wound healing OR drain OR satisfaction OR complication)</p> <p>AND</p> <p>(compression[Title/Abstract])</p> |
| Abdominal surgery | <p>(abdominoplasty OR hernia repair OR abdominal wall reconstruction)</p> <p>AND</p> <p>(binder OR compression OR compressive OR garment OR dressing OR tape OR wrapping OR bandage OR bandaging)</p> <p>AND</p> <p>(embolism OR thrombosis OR intra-abdominal OR pain OR function OR seroma OR hematoma OR pressure OR comfort OR discomfort OR bruise OR ecchymosis OR edema OR aesthetics OR scar OR bruising OR induration OR wound healing OR drain OR satisfaction OR complication)</p> <p>AND</p> <p>(compression[Title/Abstract])</p>                                                                                                                                                                        |
| Breast surgery    | <p>(breast surgery OR gynecomastia surgery OR breast lift OR breast reduction OR mammoplasty OR mastopexy OR breast augmentation)</p>                                                                                                                                                                                                                                                                                                                                                                                                                                                                                                                                                                                |

|                        |                                                                                                                                                                                                                                                                                                                                                                                                                                                                                                                                                                                                                     |
|------------------------|---------------------------------------------------------------------------------------------------------------------------------------------------------------------------------------------------------------------------------------------------------------------------------------------------------------------------------------------------------------------------------------------------------------------------------------------------------------------------------------------------------------------------------------------------------------------------------------------------------------------|
|                        | <p>AND</p> <p>(brassiere OR bra OR compression OR compressive OR garment OR dressing OR tape OR wrapping OR bandage OR bandaging)</p> <p>AND</p> <p>(contracture OR pain OR function OR seroma OR hematoma OR pressure OR comfort OR discomfort OR bruise OR ecchymosis OR edema OR aesthetics OR scar OR bruising OR induration OR wound healing OR drain OR satisfaction OR complication)</p> <p>AND</p> <p>(compression[Title/Abstract])</p>                                                                                                                                                                     |
| <p>Body contouring</p> | <p>(body contouring OR liposuction OR lipoplasty OR brachioplasty OR arm lift OR thigh lift OR belt lipectomy OR tummy tuck OR body lift OR gluteal lift OR gluteal augmentation)</p> <p>AND</p> <p>(surgical hose OR compression OR compressive OR garment OR dressing OR tape OR wrapping OR bandage OR bandaging)</p> <p>AND</p> <p>(pain OR function OR seroma OR hematoma OR pressure OR comfort OR discomfort OR bruise OR ecchymosis OR edema OR aesthetics OR scar OR bruising OR induration OR wound healing OR drain OR satisfaction OR complication)</p> <p>AND</p> <p>(compression[Title/Abstract])</p> |
