# Supplementary material for: The Use of Postoperative Compression Garments in Plastic Surgery—Necessary or Not? A Practical Review
Source: PubMed Central journal article supplement — Plast Reconstr Surg Glob Open. 2023 Sep 25;11(9):e5293. doi: 10.1097/GOX.0000000000005293 (PMC10519563; doi:10.1097/gox.0000000000005293), 2023-09-25
Supplement: gox-11-e5293-s002.pdf [file gox-11-e5293-s002.pdf]

## SDC 2. Summary of Articles Reviewed

| Article          | Type of Study  | Level of Evidence | No. of Subjects | Purpose                                                                                                                                      | Results                                                                                                                                                             |
|------------------|----------------|-------------------|-----------------|----------------------------------------------------------------------------------------------------------------------------------------------|---------------------------------------------------------------------------------------------------------------------------------------------------------------------|
| Ali, 1983        | RCT            | I                 | 54              | Explore how abdominal binders affect pulmonary function                                                                                      | Abdominal binders do not have significant effects on pulmonary function.                                                                                            |
| Arici, 2016      | RCT            | I                 | 104             | Evaluate the effects of abdominal binders on gastrointestinal function, mobility, pulmonary function, and pain after abdominal surgery       | Abdominal binders do not affect pulmonary and gastrointestinal function, but they can improve mobility soon after surgery and decrease pain.                        |
| Backman, 2023    | RCT            | I                 | 184             | Compare two different postoperative bras after breast cancer surgery and evaluate their impact on pain                                       | Among patients with pain at three weeks, patients with a stable bra with compression reported significantly lower pain score than those randomized to the soft bra. |
| Berjeaut, 2015   | Control trial  | I                 | 15              | Evaluate how compression garments affect venous flow in the common femoral vein                                                              | Compression garments can increase venous stasis.                                                                                                                    |
| Block, 2010      | Review         | V                 | –               | Explore how cold compression is used after orthopedic injury and/or surgery                                                                  | Cold compression can alleviate postoperative pain and drainage and may help patients return to function faster.                                                     |
| Cabbarzade, 2021 | RCT            | I                 | 40              | Compare the results of patients with and without external splints applied after rhinoplasty                                                  | By using surgical tape only, the disadvantages of external splinting are avoided, and at the same time, periorbital edema and ecchymosis are less common.           |
| Camirand, 2000   | Expert opinion | V                 | –               | Describe the author's practice of postoperative compression after breast augmentation and its effects on capsular contracture                | Three months of compressive maneuvers including pressing on one's breasts and lying prone decreased capsular contracture after breast augmentation.                 |
| Challita, 2019   | Case series    | IV                | 211             | Evaluate cosmetic results of rhinoplasty in the absence of postoperative nasal splinting                                                     | Satisfactory cosmetic results can be obtained while avoiding the complications, cost, and bulky dressings associated with external splints.                         |
| Cheifetz, 2010   | RCT            | I                 | 75              | Evaluate how abdominal binders affect postoperative mobility, perceived distress, pain, and pulmonary function after major abdominal surgery | Abdominal binders decreased pain and patient distress after major abdominal surgery with no effect on pulmonary function.                                           |

|                        |                |     |     |                                                                                                                                            |                                                                                                                                                                         |
|------------------------|----------------|-----|-----|--------------------------------------------------------------------------------------------------------------------------------------------|-------------------------------------------------------------------------------------------------------------------------------------------------------------------------|
| Chen, 1998             | RCT            | I   | 41  | Determine the effect of a pressure garments on post-surgical drainage and seroma formation in breast cancer patients                       | Pressure garments led to no improvements in post-operative drainage or seroma formation.                                                                                |
| Chowbey, 2000          | Case series    | IV  | 202 | Assess the risks and efficacy of laparoscopic ventral hernia repair.                                                                       | The introduction of routine postoperative binder use in authors' practice was associated with a 32% to 18% reduction in seroma incidence.                               |
| Filobbos, 2012         | Expert opinion | V   | –   | Describe the use of Tubigrip* as a compression dressing after brachioplasty                                                                | Tubigrip* can help decrease hypertrophic scarring and seroma formation after brachioplasty.                                                                             |
| Fontes de Moraes, 2023 | RCT            | I   | 32  | Evaluate the effectiveness of compression garments in reducing subcutaneous edema after abdominoplasty                                     | Patients who did not wear a compression garment after abdominoplasty showed less subcutaneous edema formation after 24 days of surgery than those who wore the garment. |
| Grillo, 2021           | Case series    | IV  | 643 | Discuss the effectiveness of bandage in bichectomy postoperatively concerning major complications like bleeding and subcutaneous emphysema | Bandages are effective in the decrease of major complications related to bichectomy.                                                                                    |
| Illouz, 1989           | Expert opinion | V   | –   | Describe the importance of compression dressings after lipoplasty and how they should be used                                              | –                                                                                                                                                                       |
| Illouz, 1989           | Case series    | IV  | 189 | Determine most effective pressure to decrease edema and optimize skin outcomes after lipoplasty                                            | The optimal pressure of postoperative compression garments is 17–20 mmHg.                                                                                               |
| Illouz, 2006           | Expert opinion | V   | –   | Describe the cosmetic outcomes and complications the author has experienced with ways to reduce said complications                         | –                                                                                                                                                                       |
| Jones, 2004            | Retrospective  | III | 910 | Determine the effects of dressings, drains, fibrin glue, tumescence and adrenaline on hematoma formation after rhytidectomy                | No difference in hematoma rate occurred with dressings, drains, and fibrin glue.                                                                                        |
| Kaafarani, 2009        | RCT            | I   | 145 | Identify factors associated with seroma formation following hernia repair                                                                  | Abdominal binder use was not associated with a decreased seroma incidence.                                                                                              |

|                   |                   |     |       |                                                                                                                                                                                                                                         |                                                                                                                                                                               |
|-------------------|-------------------|-----|-------|-----------------------------------------------------------------------------------------------------------------------------------------------------------------------------------------------------------------------------------------|-------------------------------------------------------------------------------------------------------------------------------------------------------------------------------|
| Khan, 2023        | Systematic review | I   | 2,425 | To determine the role of nasal splinting following rhinoplasty                                                                                                                                                                          | Nasal splinting did not reduce edema nor ecchymosis following rhinoplasty and was not necessary to achieve desirable outcomes                                                 |
| Kontos, 2008      | Case control      | III | 200   | Investigate the effect of pressure dressings after modified radical mastectomy in reducing seroma formation and drainage                                                                                                                | Pressure dressings reduced the rate of seroma formation and decreased the time to drain removal.                                                                              |
| Kottayasamy, 2013 | RCT               | I   | 161   | Compare the efficacy of external compression dressing, suture flap fixation, and the conventional method of closed suction drains in the prevention of seroma formation                                                                 | Compression dressing reduced duration of drainage significantly but not the total drain output or seroma incidence.                                                           |
| Larson, 2009      | RCT               | I   | 54    | Evaluate how compressive abdominal binders affect pulmonary function after laparotomy                                                                                                                                                   | Abdominal binders had no effect on postoperative pulmonary function.                                                                                                          |
| Liu, 2020         | Meta-analysis     | I   | 511   | Evaluate the effects of compression bandaging on pain, swelling, and bleeding after total knee arthroplasty                                                                                                                             | Compression bandaging does not significantly affect pain, swelling, range of motion, or bleeding postoperatively.                                                             |
| Martins, 2022     | RCT               | I   | 34    | Evaluate whether the postoperative wearing of an abdominal binder provides any additional contribution to the reduction of either seroma formation or recurrent diastasis recti when abdominoplasty is performed with quilting sutures. | The postoperative wearing of abdominal binders was not effective in preventing either seroma formation or recurrent diastasis following abdominoplasty with quilting sutures. |
| Matsen, 1974      | Animal study      | –   | –     | Explore how pressure affects swelling after fracture                                                                                                                                                                                    | Pressure can decrease swelling after fracture.                                                                                                                                |
| Mladick, 2003     | Expert opinion    | V   | –     | Describe surgical method and postoperative care for calf and ankle contouring                                                                                                                                                           | Postoperative compression dressings and pneumatic compression boots aid in creating good leg contour.                                                                         |
| Nathan, 2001      | RCT               | I   | 130   | Determine whether postoperative compression reduces hematoma formation and swelling after breast augmentation                                                                                                                           | Compressive wrapping after breast augmentation does not reduce hematoma or induration postoperatively.                                                                        |

|                 |                   |     |     |                                                                                                                                                                                     |                                                                                                                                                                                             |
|-----------------|-------------------|-----|-----|-------------------------------------------------------------------------------------------------------------------------------------------------------------------------------------|---------------------------------------------------------------------------------------------------------------------------------------------------------------------------------------------|
| Noodleman, 2002 | Expert opinion    | V   | –   | Achieve more complete removal of subplatysmal fat with laser-assisted neck lift and decrease postoperative hematomas, rippling, and folding with a new postoperative dressing       | Changes resulted in improved cervicomenal angle, decreased jowling, and minimized hematoma and ripple formation.                                                                            |
| O'Hea, 1999     | RCT               | I   | 135 | Determine whether postoperative compression after axillary lymph node dissection decreases postoperative drainage and seroma formation                                              | Postoperative compression does not reduce drainage and may increase seroma formation.                                                                                                       |
| Ohayon, 2013    | Retrospective     | III | 52  | Evaluate incidence of incorrectly sized compression stockings and skin irregularities in postoperative orthopedic patients                                                          | The incidence of ill-fitting compression stockings and skin irregularities is low.                                                                                                          |
| Olsén, 2009     | RCT               | I   | 37  | Evaluate effects of abdominal binders on pulmonary function, pain, mobility, and length of hospital stay                                                                            | Abdominal binders do not significantly affect pulmonary function, mobility, length of hospital stay, or pain.                                                                               |
| Rodrigues, 2013 | Case control      | III | 18  | Evaluate ventilatory function and intra-abdominal pressure in patients undergoing abdominoplasty with L-shaped plication of external oblique aponeurosis                            | Postoperative pain, BMI, abdominal binders, and increased abdominal pressure do not affect ventilatory function.                                                                            |
| Rothman, 2014   | Systematic review | I   | 578 | Explore how postoperative abdominal binders affect pain, seroma formation, pulmonary function, physical function, and abdominal pressure after abdominal surgery and abdominoplasty | Abdominal binders may reduce postoperative stress, but do not have a significant effect on function, seroma formation, and pain.                                                            |
| Suh, 2018       | Cohort            | II  | 52  | Determine the effect of early compression on flap survival                                                                                                                          | Early compression and ambulation do not change flow velocity or volume in flap pedicle and do not increase flap complication rate                                                           |
| Taş, 2020       | RCT               | I   | 60  | To analyze the effects of the vibration and pressure treatments in the early postoperative period of rhinoplasty                                                                    | Rapid regression of edema and ecchymosis may be achieved using the vibrating nasal cast technique that may minimize patient discomfort, pain, and sebaceous activity following rhinoplasty. |

|                  |             |    |       |                                                                                                                                                     |                                                                                                                                                                                                    |
|------------------|-------------|----|-------|-----------------------------------------------------------------------------------------------------------------------------------------------------|----------------------------------------------------------------------------------------------------------------------------------------------------------------------------------------------------|
| Teimourian, 1995 | Case series | IV | 100   | Describe the author's clinical experience using a MicroFoam tape dressing to apply compression after facelift operations                            | MicroFoam tape dressings resulted in zero occurrences of ecchymosis or hemorrhage following facelift operations                                                                                    |
| Vidal 2016       | Case series | IV | 2,033 | Describe the author's clinical experience using surgical tape without splinting following rhinoplasty                                               | Surgical tape following rhinoplasty is an inexpensive, widely available, and reliable method that is easier to apply and more comfortable than a traditional plaster                               |
| Vulović, 2018    | Case series | IV | 151   | Evaluate the incidence of nonaesthetic complications and the efficiency of corrective rhinoplasty without the use of tamponade and external splint. | Rhinoplasty without using tamponade and immobilization was safe, comfortable, and economical. The degree of pain, edema, and ecchymosis were low, as well as the incidence of other complications. |

RCT, randomized controlled trial; BMI, body mass index.

\*Mölnlycke Health Care, Peachtree Corners, Ga.

†3M, St. Paul, Minn.
